# Supplementary material for: Application of BIM and 3D Laser Scanning for Quantity Management in Construction Projects
Source: Hindawi journal article supplement (doi:10.1155/2020/8839923), 2020-01-01
Supplement: f1 [file 8839923.f1.pdf]

## APPENDIX A – Questionnaires

### GENERAL INFORMATION

Please tick on any checkbox related to your opinion. You can choose one or more selections

#### A1. Main position

- |                                                     |                                                   |
|-----------------------------------------------------|---------------------------------------------------|
| <input type="checkbox"/> Investor / Project Manager | <input type="checkbox"/> Construction constructor |
| <input type="checkbox"/> Supervisor                 | <input type="checkbox"/> Design consultant        |
| <input type="checkbox"/> Others                     |                                                   |

#### A2. Specialization

- |                                          |                                                       |
|------------------------------------------|-------------------------------------------------------|
| <input type="checkbox"/> Project manager | <input type="checkbox"/> Commander / Deputy commander |
| <input type="checkbox"/> QS              | <input type="checkbox"/> QA/QC                        |
| <input type="checkbox"/> Others          | <input type="checkbox"/> BIM                          |

#### A3. Experience in civil engineering field

- |                                    |                                     |
|------------------------------------|-------------------------------------|
| <input type="checkbox"/> < 3 years | <input type="checkbox"/> 5-10 years |
| <input type="checkbox"/> 3-5 years | <input type="checkbox"/> > 10 years |

#### A4. How many high-rise building projects have you been involved in?

- |                                       |                                        |
|---------------------------------------|----------------------------------------|
| <input type="checkbox"/> < 3 projects | <input type="checkbox"/> 5-10 projects |
| <input type="checkbox"/> 3-5 projects | <input type="checkbox"/> > 10 projects |

#### A5. Scale of high-rise building projects

- |                                              |                                                             |
|----------------------------------------------|-------------------------------------------------------------|
| <input type="checkbox"/> <50 Billion VNĐ     | <input type="checkbox"/> 500-1000 Billion >1000 Billion VNĐ |
| <input type="checkbox"/> 50-100 Billion VNĐ  |                                                             |
| <input type="checkbox"/> 100-500 Billion VNĐ |                                                             |

#### A6. Investment Fund

- |                                             |                                             |
|---------------------------------------------|---------------------------------------------|
| <input type="checkbox"/> State Investment   | <input type="checkbox"/> Private Investment |
| <input type="checkbox"/> Foreign Investment | <input type="checkbox"/> Others             |

#### A7. Your level of knowledge related to project quantity management

- Not relevant
- Neophyte
- Expert

**A8. The exported volume schedules in your management projects are used to**

- |                                                           |                                                  |
|-----------------------------------------------------------|--------------------------------------------------|
| <input type="checkbox"/> Order materials for construction | <input type="checkbox"/> Pay for owners          |
| <input type="checkbox"/> Pay for construction contractors | <input type="checkbox"/> Plan financial planning |
| <input type="checkbox"/> Manage construction site         | <input type="checkbox"/> Others                  |

**A9. What is your quantity management subject area?**

- |                                       |                                                    |
|---------------------------------------|----------------------------------------------------|
| <input type="checkbox"/> Structure    | <input type="checkbox"/> MEP                       |
| <input type="checkbox"/> Architecture | <input type="checkbox"/> Infrastructure / facility |
| <input type="checkbox"/> Others       |                                                    |

**A10. What applications do you use as your BIM tool for quantity management?**

- |                                     |                                     |
|-------------------------------------|-------------------------------------|
| <input type="checkbox"/> Excel, CAD | <input type="checkbox"/> Tekla      |
| <input type="checkbox"/> Revit      | <input type="checkbox"/> Navisworks |
| <input type="checkbox"/> Others     |                                     |

**A11. You think your quantity management method in-use is**

- |                                               |                                              |
|-----------------------------------------------|----------------------------------------------|
| <input type="checkbox"/> Not at all effective | <input type="checkbox"/> Very Effective      |
| <input type="checkbox"/> Slightly effective   | <input type="checkbox"/> Extremely effective |
| <input type="checkbox"/> Moderately effective |                                              |

**A12. Your level of knowledge related to BIM**

- Not relevant
- Neophyte
- Expert

**A13. Your level of knowledge related to 3D laser scanning**

- Not relevant
- Neophyte
- Expert

**A14. How do you personally evaluate the influence of the following factors of quantity management?**

Please tick on 01 checkbox related to your opinion.

(1) = No influence;

(2) = Weak influence;

(3) = Moderate influence;

(4) = Strong influence;

(5) = Perfect influence;

| The factors influence the quantity management in a construction project |                                                                                                                                    | Scale                    |                          |                          |                          |                          |
|-------------------------------------------------------------------------|------------------------------------------------------------------------------------------------------------------------------------|--------------------------|--------------------------|--------------------------|--------------------------|--------------------------|
|                                                                         |                                                                                                                                    | 1                        | 2                        | 3                        | 4                        | 5                        |
| 1                                                                       | The precision of the measuring instruments                                                                                         | <input type="checkbox"/> |
| 2                                                                       | The fundamental mathematical calculation support of the software in volume monitoring                                              | <input type="checkbox"/> |
| 3                                                                       | The complexity of the structural design of buildings                                                                               | <input type="checkbox"/> |
| 4                                                                       | The indefinite form of an unfinished piece of work.                                                                                | <input type="checkbox"/> |
| 5                                                                       | The exacerbated number of activities must determine the volume at the same time.                                                   | <input type="checkbox"/> |
| 6                                                                       | The urgent schedule of the project.                                                                                                | <input type="checkbox"/> |
| 7                                                                       | The actual construction quality is compared to the design drawing.                                                                 | <input type="checkbox"/> |
| 8                                                                       | The management ability of parties: construction consultant, design consultant, supervisors, investor.                              | <input type="checkbox"/> |
| 9                                                                       | The ability to calculate / breakdown the volume of the parties: construction consultant, design consultant, supervisors, investor. | <input type="checkbox"/> |
| 10                                                                      | The lack of communication, cooperation, information exchange between investors and consultants.                                    | <input type="checkbox"/> |

**A15. How do you personally evaluate the influence of the implementation of BIM – 3D Laser Scanning for quantity management in a construction project?**

Please tick on 01 checkbox related to your opinion.

(1) = No influence;

(2) = Weak influence;

(3) = Moderate influence;

(4) = Strong influence;

(5) = Perfect influence;

| The factors influence the implementation of BIM – 3D Laser Scanning for quantity management in a construction project |                                                                                                           | Scale                    |                          |                          |                          |                          |
|-----------------------------------------------------------------------------------------------------------------------|-----------------------------------------------------------------------------------------------------------|--------------------------|--------------------------|--------------------------|--------------------------|--------------------------|
|                                                                                                                       |                                                                                                           | 1                        | 2                        | 3                        | 4                        | 5                        |
| 1                                                                                                                     | The cost of the initial investment in Laser scanners and processing software                              | <input type="checkbox"/> |
| 2                                                                                                                     | The training fees for engineers who apply BIM and Laser Scanning                                          | <input type="checkbox"/> |
| 3                                                                                                                     | The constraint in critical thinking when changing from the conventional method (working with 2D drawings) | <input type="checkbox"/> |

| The factors influence the implementation of BIM – 3D Laser Scanning for quantity management in a construction project |                                                                                                         | Scale                    |                          |                          |                          |                          |
|-----------------------------------------------------------------------------------------------------------------------|---------------------------------------------------------------------------------------------------------|--------------------------|--------------------------|--------------------------|--------------------------|--------------------------|
|                                                                                                                       |                                                                                                         | 1                        | 2                        | 3                        | 4                        | 5                        |
|                                                                                                                       | to BIM – 3D Laser Scanning (working with 3D model, 3D drawings, point cloud)                            |                          |                          |                          |                          |                          |
| 4                                                                                                                     | The complexity in the integration of actual data into the model for implementation quantity management. | <input type="checkbox"/> |
| 5                                                                                                                     | The ability of the new method not compatible with current metrology rules and regulations.              | <input type="checkbox"/> |
| 6                                                                                                                     | The knowledge about the new technology between relevant parties.                                        | <input type="checkbox"/> |
| 7                                                                                                                     | The complexity in the project structural design.                                                        | <input type="checkbox"/> |
| 8                                                                                                                     | The influence of uncontrol onsite condition to the collecting process of scanner                        | <input type="checkbox"/> |
| 9                                                                                                                     | The software packages are too complex to used                                                           | <input type="checkbox"/> |
| 10                                                                                                                    | The coordination, communication and cooperation process                                                 | <input type="checkbox"/> |

**A16. How do you personally evaluate the effective of the implementation of BIM – 3D laser scanning for quantity management in a construction project?**

Please tick on 01 checkbox related to your opinion.

(1) = Not at all effective;

(2) = Slightly effective;

(3) = Moderately effective;

(4) = Very effective;

(5) = Extremely effective;

| The factors affect the implementation of BIM – 3D laser scanning for quantity management in a construction project |                                                                                                     | Scale                    |                          |                          |                          |                          |
|--------------------------------------------------------------------------------------------------------------------|-----------------------------------------------------------------------------------------------------|--------------------------|--------------------------|--------------------------|--------------------------|--------------------------|
|                                                                                                                    |                                                                                                     | 1                        | 2                        | 3                        | 4                        | 5                        |
| 1                                                                                                                  | The processing time and precision of the 3D laser scanner                                           | <input type="checkbox"/> |
| 2                                                                                                                  | The ability to automatically export volume schedule from the BIM model minimize the risks of errors | <input type="checkbox"/> |
| 3                                                                                                                  | The speed of exporting volume schedule from the BIM model                                           | <input type="checkbox"/> |
| 4                                                                                                                  | The accuracy of the exported volume schedule from the BIM model                                     | <input type="checkbox"/> |
| 5                                                                                                                  | The quality control ability of quality management                                                   | <input type="checkbox"/> |
| 6                                                                                                                  | The synchronous between parties                                                                     | <input type="checkbox"/> |

## **APPENDIX B BIM – 3D laser scanning implementing evaluation**

**B1. How do you personally evaluate the effectiveness of the implementation of BIM – 3D Laser Scanning for quantity management in a construction project compared to the conventional methods?**

- |                                               |                                              |
|-----------------------------------------------|----------------------------------------------|
| <input type="checkbox"/> Not at all effective | <input type="checkbox"/> Very effective      |
| <input type="checkbox"/> Slightly effective   | <input type="checkbox"/> Extremely effective |
| <input type="checkbox"/> Moderately effective |                                              |

**B2. Do you think that the implementation of BIM and 3D laser scan could result in faster and more accurate than the conventional methods?**

- |                                            |                                         |
|--------------------------------------------|-----------------------------------------|
| <input type="checkbox"/> Strongly disagree | <input type="checkbox"/> Agree          |
| <input type="checkbox"/> Disagree          | <input type="checkbox"/> Strongly agree |
| <input type="checkbox"/> Neutral           |                                         |

**B3. How do you personally evaluate the feasibility of the implementation of BIM – 3D Laser Scanning for quantity management in a construction project?**

- |                                             |                                            |
|---------------------------------------------|--------------------------------------------|
| <input type="checkbox"/> Totally impossible | <input type="checkbox"/> Moderate possible |
| <input type="checkbox"/> Impossible         | <input type="checkbox"/> Totally possible  |
| <input type="checkbox"/> Neutral            |                                            |

**B4. Do you want to apply BIM – 3D laser Scanning to your project**

- |                                            |                                         |
|--------------------------------------------|-----------------------------------------|
| <input type="checkbox"/> Strongly disagree | <input type="checkbox"/> Agree          |
| <input type="checkbox"/> Disagree          | <input type="checkbox"/> Strongly agree |
| <input type="checkbox"/> Neutral           |                                         |
